# Supplementary material
Source: PubMed Central journal article supplement (PMC10921838)
Supplement: NIHMS1966907-supplement-Supplementary_Data.pdf [file NIHMS1966907-supplement-Supplementary_Data.pdf]

**Supplementary file. Table S1. Search strategy.**

The following table is an explanation of the symbols used in the search strategy below.

|            |                                                                                                          |
|------------|----------------------------------------------------------------------------------------------------------|
| /          | indicates an index term (MeSH heading)                                                                   |
| exp        | before an index term indicates that all subheadings were selected                                        |
| .ab.       | indicates a search for a term in the abstract                                                            |
| .pt.       | indicates a search for term in publication type                                                          |
| .sh.       | indicates a search for a term in subject heading                                                         |
| .ti.       | indicates a search for a term in the title                                                               |
| .ti,ab,kf. | indicates a search for a term in the title/abstract/word(s) in keyword                                   |
| .tw.       | indicates a search for a term in the title/abstract                                                      |
| *          | at the end of a term indicates that this term has been truncated.                                        |
| #          | The mandated wild card character stands for one character within a word or at the end of a word.         |
| ?          | The optional wild card character stands for zero or one character within a word or at the end of a word. |
| adj        | indicates a search for two terms where they appear adjacent to each another.                             |
| adj $n$    | indicates a search for two terms where they appear within $n$ words of each another.                     |

|    |                                                          |
|----|----------------------------------------------------------|
| 1  | exp Inflammatory Bowel Diseases/                         |
| 2  | (inflam* adj3 bowel).ti,ab,kf.                           |
| 3  | IBD.ti,ab,kf.                                            |
| 4  | crohn*.ti,ab,kf.                                         |
| 5  | (ulcerative adj3 colitis).ti,ab,kf.                      |
| 6  | ((subclinical or "sub clinical") adj3 colitis).ti,ab,kf. |
| 7  | or/1-6                                                   |
| 8  | exp Uveitis/                                             |
| 9  | uveitis.ti,ab,kf.                                        |
| 10 | 8 or 9                                                   |
| 11 | 7 or 10                                                  |
| 12 | Antirheumatic Agents/                                    |
| 13 | DMARD*.ti,ab,kf.                                         |
| 14 | cDMARD*.ti,ab,kf.                                        |
| 15 | csDMARD*.ti,ab,kf.                                       |
| 16 | tDMARD*.ti,ab,kf.                                        |
| 17 | sDMARD*.ti,ab,kf.                                        |
| 18 | bDMARD*.ti,ab,kf.                                        |
| 19 | disease modifying anti*.ti,ab,kf.                        |

|    |                                                                              |
|----|------------------------------------------------------------------------------|
| 20 | oral small molecule*.ti,ab,kf.                                               |
| 21 | (OSM or OSMs).ti,ab,kf.                                                      |
| 22 | (biologic* adj (drug* or medication* or medicine* or pharmaceut*)).ti,ab,kf. |
| 23 | (target* adj3 (drug* or medication* or medicine* or pharmaceut*)).ti,ab,kf.  |
| 24 | Methotrexate/                                                                |
| 25 | (methotrexate or MTX).ti,ab,kf.                                              |
| 26 | Sulfasalazine/                                                               |
| 27 | sulfasala#ine.ti,ab,kf.                                                      |
| 28 | sulphasala#ine.ti,ab,kf.                                                     |
| 29 | Leflunomide/                                                                 |
| 30 | leflunomide.ti,ab,kf.                                                        |
| 31 | exp Cyclosporins/                                                            |
| 32 | c#closporin*.ti,ab,kf.                                                       |
| 33 | Hydroxychloroquine/                                                          |
| 34 | Hydroxychloroquine.ti,ab,kf.                                                 |
| 35 | Acitretin/                                                                   |
| 36 | acitretin.ti,ab,kf.                                                          |

|    |                                              |
|----|----------------------------------------------|
| 37 | etretin.ti,ab,kf.                            |
| 38 | exp Fumarates/                               |
| 39 | fumar*.ti,ab,kf.                             |
| 40 | abatacept/                                   |
| 41 | abatacept.ti,ab,kf.                          |
| 42 | Orencia*.ti,ab,kf.                           |
| 43 | exp Phosphodiesterase 4 Inhibitors/          |
| 44 | apremilast.ti,ab,kf.                         |
| 45 | (Phosphodiesterase adj3 Inhibit*).ti,ab,kf.  |
| 46 | PDE4*.ti,ab,kf.                              |
| 47 | PDEi*.ti,ab,kf.                              |
| 48 | Janus Kinase Inhibitors/                     |
| 49 | Janus Kinase Inhibit*.ti,ab,kf.              |
| 50 | (JAK adj3 inhibit*).ti,ab,kf.                |
| 51 | JAKi*.ti,ab,kf.                              |
| 52 | (JAK1* or JAK2* or JAK3* or TYK2*).ti,ab,kf. |
| 53 | tofacitinib.ti,ab,kf.                        |
| 54 | Xeljanz*.ti,ab,kf.                           |
| 55 | upadacitinib.ti,ab,kf.                       |

|    |                                                                |
|----|----------------------------------------------------------------|
| 56 | filgotinib.ti,ab,kf.                                           |
| 57 | baricitinib.ti,ab,kf.                                          |
| 58 | Tumor Necrosis Factor-alpha/                                   |
| 59 | (tumo?r necrosis factor* adj2 (block* or inhibit*)).ti,ab,kf.  |
| 60 | (TNF?i or TNF* inhibit* or TNF* block* or anti TNF*).ti,ab,kf. |
| 61 | Etanercept/                                                    |
| 62 | etanercept*.ti,ab,kf.                                          |
| 63 | Enbrel*.ti,ab,kf.                                              |
| 64 | Erelzi*.ti,ab,kf.                                              |
| 65 | adalimumab/                                                    |
| 66 | adalimumab*.ti,ab,kf.                                          |
| 67 | Humira*.ti,ab,kf.                                              |
| 68 | Amjevita*.ti,ab,kf.                                            |
| 69 | certolizumab pegol/                                            |
| 70 | certolizumab.ti,ab,kf.                                         |
| 71 | Cimzia*.ti,ab,kf.                                              |
| 72 | golimumab.ti,ab,kf.                                            |
| 73 | Simponi*.ti,ab,kf.                                             |
| 74 | Infliximab/                                                    |

|    |                           |
|----|---------------------------|
| 75 | infliximab*.ti,ab,kf.     |
| 76 | Remicade*.ti,ab,kf.       |
| 77 | Inflectra*.ti,ab,kf.      |
| 78 | CT-P13*.ti,ab,kf.         |
| 79 | Remsima*.ti,ab,kf.        |
| 80 | Interleukin-17/           |
| 81 | Interleukin 17*.ti,ab,kf. |
| 82 | IL 17*.ti,ab,kf.          |
| 83 | IL17*.ti,ab,kf.           |
| 84 | ixekizumab.ti,ab,kf.      |
| 85 | Taltz*.ti,ab,kf.          |
| 86 | secukinumab.ti,ab,kf.     |
| 87 | Cosentyx*.ti,ab,kf.       |
| 88 | bimekizumab.ti,ab,kf.     |
| 89 | brodalumab.ti,ab,kf.      |
| 90 | exp Interleukin-12/       |
| 91 | Interleukin 12*.ti,ab,kf. |
| 92 | IL 12*.ti,ab,kf.          |
| 93 | IL12*.ti,ab,kf.           |

|     |                                                           |
|-----|-----------------------------------------------------------|
| 94  | Ustekinumab/                                              |
| 95  | ustekinumab.ti,ab,kf.                                     |
| 96  | Stelara*.ti,ab,kf.                                        |
| 97  | exp Interleukin-23/                                       |
| 98  | Interleukin 23*.ti,ab,kf.                                 |
| 99  | IL 23*.ti,ab,kf.                                          |
| 100 | IL23*.ti,ab,kf.                                           |
| 101 | risankizumab.ti,ab,kf.                                    |
| 102 | guselkumab.ti,ab,kf.                                      |
| 103 | briakinumab.ti,ab,kf.                                     |
| 104 | tildrakizumab.ti,ab,kf.                                   |
| 105 | or/12-104 [drug treatments]                               |
| 106 | randomized controlled trial.pt.                           |
| 107 | controlled clinical trial.pt.                             |
| 108 | randomi#ed.ab. [modified to pick up 's' and 'z' variants] |
| 109 | placebo.ab.                                               |
| 110 | clinical trials as topic.sh.                              |
| 111 | randomly.ab.                                              |
| 112 | trial.ti.                                                 |

|     |                                                                                                                        |
|-----|------------------------------------------------------------------------------------------------------------------------|
| 113 | or/106-112                                                                                                             |
| 114 | exp animals/ not humans.sh.                                                                                            |
| 115 | 113 not 114 [Cochrane Highly Sensitive Search Strategy: sensitivity- and precision-maximizing version (2008 revision)] |
| 116 | 11 and 105 and 115                                                                                                     |
| 117 | limit 116 to ed=20130219-20200828 [entry date: when processing of record ends]                                         |
| 118 | limit 116 to dt=20130219-20200828 [Create date - date added to PubMed]                                                 |
| 119 | 117 or 118                                                                                                             |
